# Supplementary material
Source: PubMed Central journal article supplement (PMC3024794)
Supplement: supp_M110.175406_jbc.M110.175406-2.pdf [file supp_M110.175406_jbc.M110.175406-2.pdf]

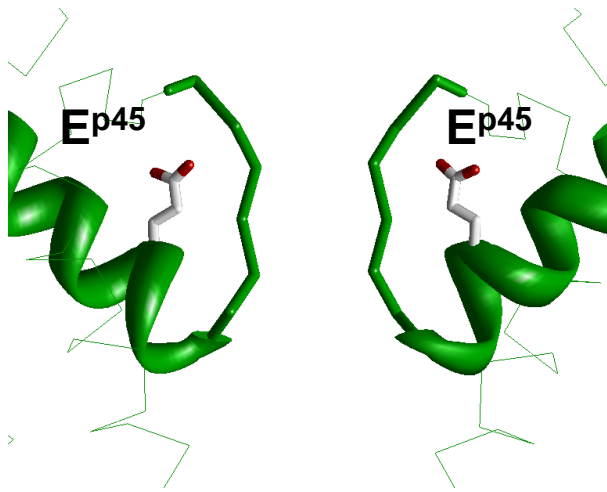

Figure S2. The outer pore in KcsA in which  $E^{p45}$  sidechains are projected towards the ascending limbs.

Figure S2
